# Supplementary material for: Heat Shock Protein 90 as a Prognostic Marker and Therapeutic Target for Adrenocortical Carcinoma
Source: Front Endocrinol (Lausanne). 2019 Jul 19;10:487. doi: 10.3389/fendo.2019.00487 (PMC6658895; doi:10.3389/fendo.2019.00487)
Supplement: Supplementary file 1 [file Data_Sheet_1.ZIP]

Archive with 6 entries (6 files):
- Supplemental Figure_1.tif
- Supplemental Figure_2.tif
- Supplemental Material_table 1.docx
- Supplemental Material_table 2.docx
- Supplemental Material_table 3.docx
- Supplemental Material_table 4.docx
